# Supplementary material for: CaMKIIβ is localized in dendritic spines as both drebrin‐dependent and drebrin‐independent pools
Source: PubMed Central journal article supplement — J Neurochem. 2018 Jun 11;146(2):145–59. doi: 10.1111/jnc.14449 (PMC6099455; doi:10.1111/jnc.14449), 2018-06-11
Supplement: JNC-146-145-s001.pdf [file JNC-146-145-s001.pdf]

## CaMKII $\beta$ is localized in dendritic spines as both drebrin-dependent and drebrin-independent pools

Hiroyuki Yamazaki, Yoshio Sasagawa, Hideyuki Yamamoto, Haruhiko Bito and Tomoaki Shirao

### Supplementary Figures

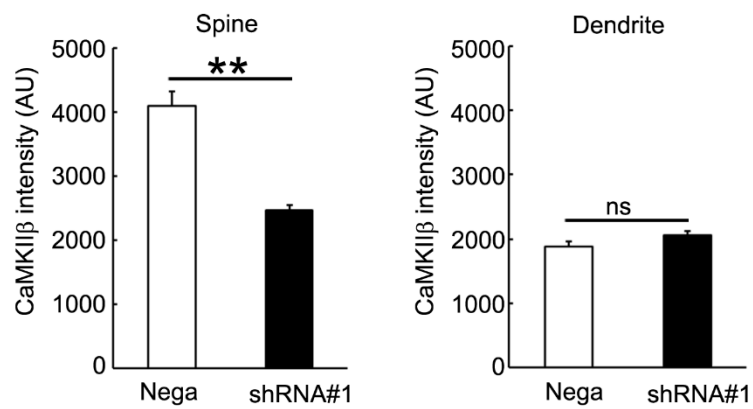

**Figure S1.** The immunofluorescence intensity of CaMKII $\beta$  was decreased in dendritic spines but not in dendritic shafts in drebrin-KD neurons. AU, Arbitrary units. Data are presented as means  $\pm$ SEM (\*\* $p < 0.01$ , Welch's  $t$ -test).

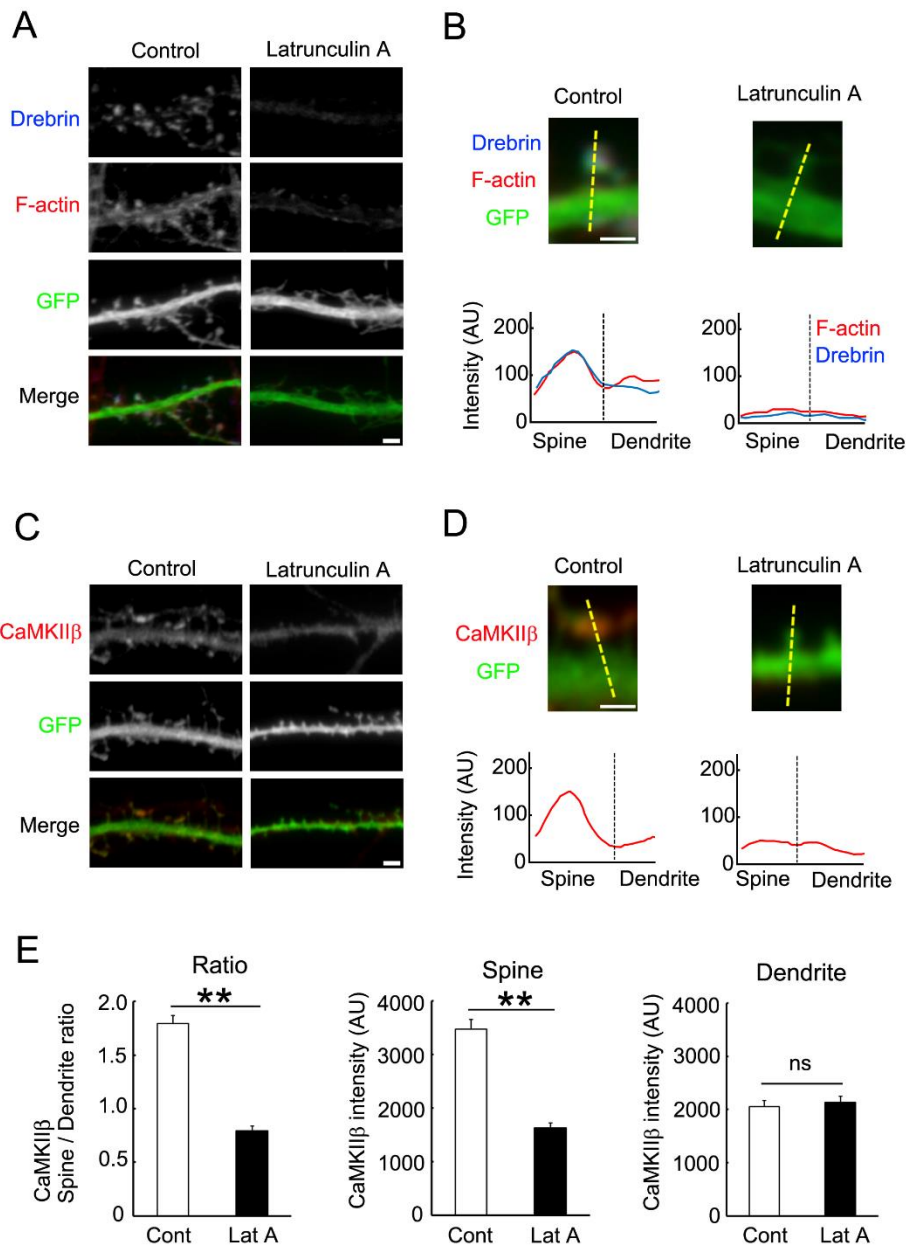

**Figure S2.** F-actin disruption decreased drebrin and CaMKII $\beta$  from dendritic spines. (A) Cultured neurons were treated with 5  $\mu$ M-latrunculin A for 10 min. Latrunculin A treatment abolished drebrin cluster from dendritic spines. Scale bar, 2  $\mu$ m. (B) Enlarged images of the dendritic spines of control and latrunculin A treated neurons. The line scans show drebrin (blue) and F-actin (red) pixel intensities across the spine and dendrite. Scale bar, 1  $\mu$ m. (C) Latrunculin A treatment decreased the immunofluorescence intensities of CaMKII $\beta$  in dendritic spines. (D) The line scans show CaMKII $\beta$  pixel intensities across the spine and dendrite. Scale bar, 1  $\mu$ m. (E) Quantifications of the intensity of CaMKII $\beta$

in dendritic spine and dendritic shaft of control and latrunculin A treated neurons. Data are presented as means  $\pm$ SEM (n = 31 for control and n = 16 for Latrunculin A treatment, \*\* $p < 0.01$ , Welch's  $t$ -test).

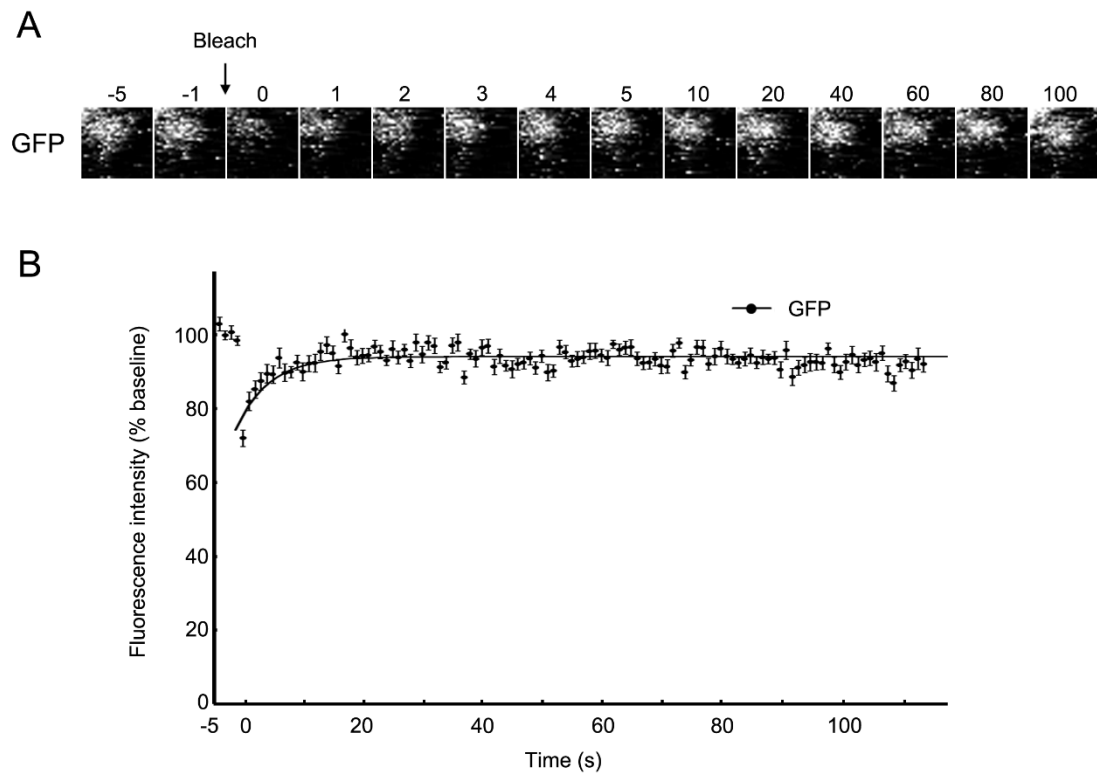

**Figure S3.** FRAP analysis of GFP in dendritic spines. (A) Cultured neurons were transfected with GFP and imaged at 15 – 16 DIV. Live confocal images of GFP were captured every 1 s for 120 s. Photobleaching was performed at the time point before 0 s. (B) The FRAP curve shows the average normalized fluorescence intensity of 26 spines measured. Error bars represent standard error of the mean. The solid line is the fit with single exponential recovery.
